1 **TITLE PAGE**

2

3 **High-Throughput ChIPmentation: freely scalable, single day ChIPseq data**  
4 **generation from very low cell-numbers**

5

6 Charlotte Gustafsson<sup>1</sup>, Ayla De Paepe<sup>1</sup>, Christian Schmidl<sup>3</sup> and Robert Månsson<sup>1,2</sup>

7

8 [charlotte.gustafsson@ki.se](mailto:charlotte.gustafsson@ki.se); [ayla.de.paepe@ki.se](mailto:ayla.de.paepe@ki.se); [CSchmidl@cemm.oeaw.ac.at](mailto:CSchmidl@cemm.oeaw.ac.at);

9 [robert.mansson@ki.se](mailto:robert.mansson@ki.se)

10

11 <sup>1</sup>Center for Hematology and Regenerative Medicine Huddinge, Karolinska  
12 Institutet, Stockholm, Sweden

13 <sup>2</sup>Hematology Center, Karolinska University Hospital, Stockholm, Sweden

14 <sup>3</sup>Regensburg Centre for Interventional Immunology (RCI) and University Medical  
15 Center of Regensburg, Germany.

16

17 Correspondence should be addressed to R.M. ([robert.mansson@ki.se](mailto:robert.mansson@ki.se))

18

19 **ABSTRACT**

20 Chromatin immunoprecipitation coupled to sequencing (ChIP-seq) is widely  
21 used to map histone modifications and transcription factor binding on a genome-  
22 wide level. Here, we present high-throughput ChIPmentation (HT-  
23 ChIPmentation) that eliminates the need for DNA purification prior to library  
24 amplification and reduces reverse-crosslinking time from hours to minutes. The  
25 resulting workflow is easily established, extremely rapid, and compatible with  
26 requirements for very low numbers of FACS sorted cells, high-throughput  
27 applications and single day data generation.

28

29 **KEYWORDS**

30 chromatin immunoprecipitation; ChIP-seq; ChIPmentation; high-throughput  
31 genomics; epigenetics

32

33

## 34 **BACKGROUND**

35 The combination of chromatin immunoprecipitation with high-throughput  
36 sequencing (ChIP-seq) has become the method of choice for mapping chromatin-  
37 associated proteins and histone-modifications on a genome-wide level.

38

39 The ChIP-seq methodology has rapidly developed [1-4]. Despite this, performing  
40 ChIP-seq on limited cell-numbers and in a high-throughput manner remains  
41 technically challenging. This is largely due to decreasing input material leading  
42 to progressively increasing losses of material during DNA preparation and  
43 inefficiencies of enzymatic reactions used for library preparation. While elegant  
44 strategies have been developed to resolve these issues, they remain laborious  
45 and have not seen wider use [5-12].

46

47 ChIPmentation [3] effectively alleviates the issues associated with traditional  
48 library preparation methodologies by introducing sequencing-compatible  
49 adapters to bead-bound chromatin using Tn5 transposase (tagmentation). While  
50 fast and convenient, the methodology still relies on the use of traditional reverse  
51 crosslinking and DNA purification procedures prior to library amplification,  
52 hampering processing time, DNA recovery, and limiting scalability for high-  
53 throughput applications.

54

55 Here, we present freely scalable high-throughput ChIPmentation (HT-  
56 ChIPmentation) that by eliminating the need for DNA purification and traditional  
57 reverse-crosslinking prior to library amplification, dramatically reduces  
58 required time and input cell numbers. In comparison with current ChIP-seq  
59 variants [3, 5-12], HT-ChIPmentation is technically simple, extremely rapid and  
60 widely applicable, being compatible with both very low cell number  
61 requirements and high-throughput applications.

62

## 63 **RESULTS**

64 The adapters introduced by Tn5 are covalently linked only to one strand of the  
65 tagmented DNA. The complete adapters, compatible with PCR amplification, are  
66 created through a subsequent extension reaction. With this in mind, we reasoned

67 that performing adapter extension of tagmented bead-bound chromatin and  
68 high-temperature reverse crosslinking [6], would allow us to bypass the DNA  
69 purification step.

70

71 To validate this approach and benchmark it against standard ChIPmentation  
72 (Fig. 1A and Supplemental Fig. 1, Additional file 1), we FACS sorted defined  
73 numbers of formaldehyde fixed cells and performed ChIP with subsequent  
74 library preparation on cell numbers ranging from 0.1k-150k cells. HT-  
75 ChIPmentation indeed produced excellent sequencing profiles (Fig. 1B), and a  
76 consistent library size over >100-fold difference in input cell numbers  
77 (Supplemental Fig. 2A, Additional file 1).

78

79 Looking specifically at H3K27Ac (a histone modification demarcating active  
80 promoters and enhancers [13]) HT-ChIPmentation and ChIPmentation samples  
81 generated in parallel from high cell-numbers (50k-150k cells), both methods  
82 generated high-quality data that is comparable in regard to: concordance of  
83 library profiles (Fig. 1B); mappability of sequencing reads (Supplemental Table  
84 1, Additional file 1); correlation between samples (Fig. 1C); number, quality  
85 scores and signal range of identified peaks (Supplemental Fig. 2B-D, Additional  
86 file 1); and peak overlap (Fig. 1D).

87

88 To perform accurate peak calling, input controls were generated by direct  
89 tagmentation of 500 cell equivalents of sonicated chromatin (5% of 10k  
90 sonicated cells), subsequently processed in parallel with corresponding 10k HT-  
91 ChIPmentation samples (Fig. 1A). The HT-ChIPmentation compatible input  
92 controls produced similar results as input controls prepared using traditional  
93 library preparation methodology, in terms of library profiles and even genomic  
94 coverage (Fig. 1B and E).

95

96 We next compared H3K27Ac HT-ChIPmentation and ChIPmentation samples  
97 from progressively lower input cell-numbers. As expected, eliminating losses  
98 associated with DNA purification allowed HT-ChIPmentation samples to  
99 maintain much higher library complexity (>75% unique reads down to 2.5k

100 cells) than ChIPmentation samples generated from the same number of cells (Fig.  
101 1F). This difference in library quality was directly reflected in HT-ChIPmentation  
102 samples generated from a few thousand cells maintaining: consistent high  
103 quality library profiles (Fig. 1B); mappability (Supplemental Table 1, Additional  
104 file 1); number, quality scores and signal range of identified peaks (Supplemental  
105 Fig. 2B-D, Additional file 1); high correlation between samples (Fig. 1G); and high  
106 peak overlap (Fig. 1H). Similar results were obtained for H3K27Ac HT-  
107 ChIPmentation data generated in a single day (Fig. 1B, G and Supplemental figure  
108 2B-D, Additional file 1). Based on the same metrics, CTCF (a chromatin  
109 organizing protein [14]) HT-ChIPmentation experiments further verified the  
110 robustness of the method with cell numbers in the range of a few thousands cells  
111 (Fig. 1B, G, H; Supplemental Fig. 2B-D and S3A-B, Additional file 1).

112

## 113 **DISCUSSION**

114 Here we present HT-ChIPmentation, an improved and simplified tagmentation  
115 based approach to produce ChIP-seq libraries. We demonstrate that the adapters  
116 introduced by Tn5 can be extended directly on the bead-bound chromatin.  
117 Through this, we can combine ChIPmentation [3] with high-temperature reverse  
118 crosslinking and direct library amplification without prior DNA purification [6].  
119 Even compared to the already technically simple and fast ChIPmentation  
120 method, HT-ChIPmentation is easier to perform and greatly reduces the time  
121 needed to produce sequencing ready libraries (Fig. 1I). In fact, HT-  
122 ChIPmentation together with sequencing can be performed in a single day (Fig.  
123 1B, G and I; S2B-D, Additional file 1). This makes the protocol ideal for rapid data  
124 generation and compatible with the development of clinical  
125 diagnostic/prognostic applications relying on chromatin associated features to  
126 distinguish, for example, tumor subtypes [15, 16]

127

128 The removal of the DNA purification step, allows for fully taking advantage of  
129 that tagmentation of chromatin – as opposed to traditional adapter ligation [6, 8]  
130 – remains highly effective even with very limited input material ([3] and  
131 Supplemental Fig 2A, Additional file 1). Together, the reduced losses of material  
132 and effective addition of adapters, allows HT-ChIPmentation to be performed on

133 just a few thousand FACS sorted cells with maintained quality and library  
134 complexity. Hence, HT-ChIPmentation provides a robust and technically simple  
135 workflow for characterizing epigenetic changes and transcription factor binding  
136 in rare subsets of cells.

137

138 Input controls are commonly used to exclude biases in the input material and as  
139 a negative control for identification of peak regions. Here we show that input  
140 controls can be prepared in parallel with HT-ChIPmentation samples, through  
141 direct tagmentation and library amplification of sonicated chromatin. The  
142 protocol requires very limited material (500 cell equivalents of sonicated  
143 chromatin), making it both feasible and convenient to directly prepare adequate  
144 controls for peak finding, also from rare subsets of cells.

145

146 The simplicity of the HT-ChIPmentation protocol – allowing for performing all  
147 steps from cells to amplified sequencing ready library without DNA purification  
148 – makes it perfectly suited for epigenetic characterization at any scale. While HT-  
149 ChIPmentation is directly compatible with full automation, experiments  
150 presented here were simply performed in 96-well plates using a multi-channel  
151 pipette, demonstrating that HT-ChIPmentation makes it highly feasible to  
152 perform epigenome scale projects in a matter of days using standard laboratory  
153 equipment.

154

## 155 **CONCLUSION**

156 Here we introduce HT-ChIPmentation, an improved tagmentation based ChIP-  
157 seq protocol that through the extension of the Tn5-inserted adapters on bead-  
158 bound chromatin, allows for direct library amplification without prior DNA  
159 purification. In comparison to current state-of-the-art ChIP-seq protocols [3, 5-  
160 12], HT-ChIPmentation is technically simple, extremely rapid and widely  
161 applicable, being compatible with very low cell number requirements, high-  
162 throughput applications and single day data generation. Taken together, HT-  
163 ChIPmentation provides a versatile and simplistic workflow attractive as the  
164 mainstay protocol for epigenome projects of any scale.

165

166 **METHODS**

167 Cells

168 Cultured MEC1 cells were stained with LIVE/DEAD fixable Aqua stain  
169 (Invitrogen) to allow for excluding cells dead already prior to fixation (during  
170 subsequent FACS sorting) and fixed using 1% PFA (Pierce). Aliquots of 10k cells  
171 were FACS sorted directly into 100 $\mu$ l SDS lysis buffer (50mM Tris/HCl, 0.5% SDS,  
172 and 10mM EDTA) supplemented with 1X cOmplete EDTA-free protease inhibitor  
173 (Roche) and stored at -80°C until use. For aliquots of cells (50k and 150k), where  
174 the sheath fluid volume is non-negligible, cells were sorted into PBS, spun down  
175 (2000g 5min) and resuspended in 100 $\mu$ l SDS lysis buffer prior to freezing.  
176 Sorting was performed using a BD FACSAriaIIu cell sorter (BD Biosciences) with  
177 an 85 $\mu$ m nozzle.

178

179 Chromatin Immunoprecipitation and tagmentation

180 For ChIP, polyclonal anti-H3K27Ac (Diagenode, cat# C15410196, lot# A1723-  
181 0041D) antibody or anti-CTCF (Diagenode, cat# C15410210, lot# A2359-  
182 00234P) antibody was added to Protein G-coupled Dynabeads (ThermoFisher)  
183 in PBS with 0.5% BSA and incubated with rotation for 4h at 4°C (0.5h at RT for  
184 HT-ChIPmentation samples processed in a single day). For 50-150k cells, 10 $\mu$ l  
185 beads incubated with 3 $\mu$ g H3K27Ac or 1.5 $\mu$ g CTCF antibody were used per ChIP.  
186 For 0.1-10k cells, 2 $\mu$ l beads incubated with 0.6 $\mu$ g H3K27Ac or 0.3 $\mu$ g CTCF  
187 antibody were used per ChIP. Fixed cells (FACS sorted) frozen in SDS lysis buffer  
188 were thawed at room temperature. To perform ChIP on <10k cells, aliquots were  
189 diluted with SDS lysis buffer and 100 $\mu$ l containing the appropriate number of  
190 cells were processed. Cells were sonicated for 12 cycles of 30 sec on/30 sec off  
191 on high power using a Bioruptor Plus (Diagenode). To neutralize the SDS, Triton  
192 X100 was added to a final concentration of 1% along with 2 $\mu$ l 50x cOmplete  
193 protease inhibitor (final 1x). Samples were incubated at room temperature for  
194 10min and when applicable 5% aliquots were saved for preparation of input  
195 controls. Antibody-coated Dynabeads were washed with PBS with 0.5% FCS and  
196 mixed with cell lysate in PCR tubes. Tubes were incubated rotating overnight (or  
197 4h for HT-ChIPmentation samples processed in a single day) at 4°C.

198 Immunoprecipitated chromatin was washed with 150 $\mu$ l of low-salt buffer  
199 (50mM Tris/HCl, 150 mM NaCl, 0.1% SDS, 0.1% NaDOC, 1% Triton X-100, and  
200 1mM EDTA), high-salt buffer (50mM Tris/HCl, 500mM NaCl, 0.1% SDS, 0.1%  
201 NaDoc, 1% Triton X-100, and 1 mM EDTA) and LiCl buffer (10 mM Tris/HCl, 250  
202 mM LiCl, 0.5% IGEPAL CA-630, 0.5% NaDOC, and 1mM EDTA), followed by two  
203 washes with TE buffer (10mM Tris/HCl and 1mM EDTA) and two washes with  
204 ice cold Tris/HCl pH8. For tagmentation, bead bound chromatin was  
205 resuspended in 30 $\mu$ l of tagmentation buffer, 1 $\mu$ l of transposase (Nextera,  
206 Illumina) was added and samples were incubated at 37°C for 10 minutes  
207 followed by two washes with low-salt buffer.

#### 208 High-throughput ChIPmentation library preparation

209 For HT-CM samples, bead bound tagmented chromatin was diluted in 20 $\mu$ l of  
210 water. PCR master mix (Nextera, Illumina) and indexed amplification primers  
211 [17] (0.125 $\mu$ M final concentration) was added and libraries prepared using the  
212 following program: 72°C 5min (adapter extension); 95°C 5min (reverse cross-  
213 linking); followed by 11 cycles of 98°C 10s, 63°C 30s and 72°C 3min.

214 For preparation of HT-CM compatible input controls, 1 $\mu$ l of 50mM MgCl<sub>2</sub> was  
215 added to 5 $\mu$ l sonicated lysate (5% aliquot of 10k samples) to neutralize the  
216 EDTA in the SDS lysis buffer. 30 $\mu$ l of tagmentation buffer and 1 $\mu$ l transposase  
217 (Nextera, Illumina) was added, and samples were incubated at 37°C for 10min.  
218 22.5 $\mu$ l of the transposition reaction were combined with 15 $\mu$ l of PCR master mix  
219 and 2.5 $\mu$ l of primer mix (Nextera, Illumina). Libraries were subsequently  
220 amplified as described for HT-ChIPmentation samples.

#### 221 ChIPmentation library preparation

222 For standard reverse crosslinking, chromatin complexes were diluted with 200 $\mu$ l  
223 ChIP elution buffer (10mM Tris/HCl, 0.5% SDS, 300mM NaCl, and 5 mM EDTA)  
224 and 2 $\mu$ l of 20 $\mu$ g/ml proteinase K (Thermo Scientific). Samples were vortexed and  
225 incubated with shaking overnight at 65°C. After reverse crosslinking, 1 $\mu$ l  
226 20 $\mu$ g/ml RNase (Sigma) was added and incubated at 37°C for 30min. After  
227 another 2h of incubation with 2 $\mu$ l of proteinase K (20mg/ml) at 55°C, samples  
228 were placed in a magnet to trap magnetic beads and supernatants were



229 collected. DNA purification was carried out using Qiagen MinElute PCR  
230 Purification Kit. 15 $\mu$ l of PCR master mix and 5 $\mu$ l of primer mix (Nextera,  
231 Illumina) was added to 20 $\mu$ l of eluted DNA, and libraries were amplified as  
232 described for HT-ChIPmentation libraries.

233 Preparation of conventional input control

234 Sonicated material from 50k cells was reverse crosslinked as described for  
235 ChIPmentation. 2ng of DNA was used for library preparation using the ThruPLEX  
236 DNA-seq kit (Rubicon Genomics) with 11 cycles of PCR amplification.

237 Post-PCR library cleanup and sequencing

238 After PCR amplification, library cleanup was done using Agencourt AmPureXP  
239 beads (Beckman Coulter) at a ratio of 1:1. DNA concentrations in purified  
240 samples were measured using the Qubit dsDNA HS Kit (Invitrogen). Libraries  
241 were pooled and single-end sequenced (50 cycles) using the Nextseq500  
242 platform (Illumina).

243

244 Basic processing of ChIP-seq and input control sequencing data

245 Quality of the sequenced samples was assessed using FastQC v0.11.5 [18].  
246 Samples were mapped to the human reference genome (hg19) using Bowtie2  
247 v2.2.3 [19] with default settings. Further basic processing was performed using  
248 HOMER v4.8.3 [20]. Specifically, mapped reads were converted into  
249 tagdirectories by the `makeTagDirectory` command using settings for the  
250 human genome (`-genome hg19`) and removing duplicate reads by allowing  
251 only one tag to start per base pair (`-tbp 1`).

252

253 Genome Browser visualizations

254 Bedgraphs were created for each sample using HOMER's `makeUCSCfile`.  
255 Tracks were uploaded and visualized using the UCSC genome browser [21].

256

257 Peak finding and plotting peak metrics

258 Peak finding was performed using the `findPeaks` command in HOMER. Peaks  
259 were called using default settings for histone modifications (`-style histone`)  
260 and transcription factors (`-style factor`) for H3K27Ac and CTCF



261 respectively with input (-i) as a control. Visualization was done in R v3.1.0 [22],  
262 using the built in `barplot` and `boxplot` R-functions to plot peak numbers and  
263 peak quality scores, respectively.

264

265 Making and annotating peak catalogs

266 Peak catalogs were created by merging all peak files of samples analyzed using  
267 HOMER's `mergePeaks` command. Setting used (`-size given`) ensured that  
268 peaks with literal overlap were merged to one peak while peaks unique to one  
269 sample were directly added to the peak catalog. Subsequently, peak catalogs  
270 were annotated with unnormalized (`-raw`) read counts within peaks in the  
271 catalog for each individual sample using HOMER's `annotatePeaks.pl` script.

272

273 Plotting peak read distributions and correlation between samples

274 Raw counts were log normalized in R as follows:  
275 `log(df[,countsCols]+1,2)`. Log2 counts were subsequently plotted using  
276 the built in `boxplot` R-function. These same Log2 counts were used to calculate  
277 sample correlations, using the build-in `cor` R-function with `spearman`  
278 correlation. Correlation matrices were visualized with the `pheatmap` function  
279 from the `pheatmap` R-package using color scales generated with the build-in  
280 `colorRampPalette` R-function.

281

282 Plotting reads within 1kb bins for input control samples

283 A file containing 1kb bins covering the whole genome was created using the  
284 `makewindows` command from `bedtools` v2.26.0 [23] using a window size of 1kb  
285 (`-w 1000`). Chromosome sizes were retrieved as follows: `mysql --`  
286 `user=genome --host=genome-mysql.cse.ucsc.edu -A -e`  
287 `"select chrom, size from hg19.chromInfo" > hg19.genome`.  
288 Raw reads in each 1kb bin for each input control were counted using HOMER's  
289 `annotatePeaks.pl` script, as described above. Raw read distributions were  
290 converted to RPKM in R based on the standard RPKM formula. Resulting RPKM  
291 distributions were plotted with the built-in `boxplot` R-function.

292

293

294 Determining top peak overlap

295 Peaks identified in individual samples were overlapped with in-house code using  
296 the IRanges [24] R-package. Top peaks overlap was considered to be the  
297 percentage of high quality peaks (50% of peaks with highest quality scores) in  
298 the reference sample that overlap ( $\geq 1$  bp) with a peak in the second sample. For  
299 purposes of determining peak overlap, CTCF peaks were extended with 50bp up  
300 and downstream, considering findPeaks with `-style factor` only calls a  
301 small region around the peak maximum. Peak overlaps were visualized using the  
302 `heatmap` function from the `heatmap` R-package using color scales generated  
303 with the build-in `colorRampPalette` R-function.

304

305 Comparing library complexity

306 To compare duplication rates between HT-ChIPmentation and ChIPmentation  
307 samples, fastq files were randomly down-sampled to the total number of reads in  
308 the smallest file for each cell number. Down sampling was performed using the  
309 `fastq-sample` script from `fastq-tools` v0.8 [25]. Fraction of unique reads was  
310 subsequently determined for each file using `FastQC` v0.11.5.

311

312 Motif enrichment analysis

313 Enrichments of known transcription factor binding motifs in peaks were  
314 identified using HOMER's `findMotifsGenome.pl` script with default settings.

315

316 **DECLARATIONS**

317 **Ethics approval and consent to participate**

318 Not applicable.

319

320 **Consent for publication**

321 Not applicable.

322

323 **Availability of data and materials**

324 The generated data sets are available from the European Nucleotide Archive [26]  
325 under the study accession number: [PRJEB23059](https://www.ebi.ac.uk/ena/record/PRJEB23059)

326

327 **Competing interests**

328 C.S. has a pending patent application for CHIPmentation. C.G., A.D.P., and R.M.  
329 have no competing financial interests.

330

331 **Funding**

332 This work was funded by the Swedish Cancer Foundation (Cancerfonden), the  
333 Swedish Research Council (VR), the Knut and Alice Wallenberg Foundation  
334 (KAW) and the Swedish Foundation for Strategic Research (SSF).

335

336 **Authors' contributions**

337 C.G. and R.M. devised the HT-ChIPmentation workflow and planned the study;  
338 C.G. performed experiments; C.G., A.D.P. and R.M. analyzed the data; C.S. provided  
339 critical insights; R.M. supervised the research; and all authors contributed to the  
340 writing of the manuscript.

341

342 **Acknowledgements**

343 We thank: Prof. Joakim Dillner and colleagues for access to the NextSeq 500  
344 system; Prof. Anders Rosén for providing the MEC1 cell-line; Dr. Yin C. Lin for  
345 critical reading of the manuscript; and UPPMAX Next Generation Sequencing  
346 Cluster & Storage (UPPNEX) for computational resources.

347

348 **REFERENCES**

- 349 1. Furey TS: ChIP-seq and beyond: new and improved methodologies to  
350 detect and characterize protein-DNA interactions. *Nature Reviews*  
351 *Genetics* 2012, 13:1-13.
- 352 2. Sundaram AYM, Hughes T, Biondi S, Bolduc N, Bowman SK, Camilli A,  
353 Chew YC, Couture C, Farmer A, Jerome JP, et al: A comparative study of  
354 ChIP-seq sequencing library preparation methods. *BMC Genomics* 2016,  
355 17:1-12.
- 356 3. Schmidl C, Rendeiro AF, Sheffield NC, Bock C: CHIPmentation: fast, robust,  
357 low-input ChIP-seq for histones and transcription factors. *Nature Methods*  
358 2015, 12:963-965.

- 359 4. Rotem A, Ram O, Shores N, Sperling RA, Goren A, Weitz DA, Bernstein  
360 BE: Single-cell ChIP-seq reveals cell subpopulations defined by chromatin  
361 state. *Nat Biotechnol* 2015, 33:1165-1172.
- 362 5. Lara-Astiaso D, Weiner A, Lorenzo-Vivas E, Zaretsky I, Jaitin DA, David E,  
363 Keren-Shaul H, Mildner A, Winter D, Jung S, et al: Immunogenetics.  
364 Chromatin state dynamics during blood formation. *Science* 2014,  
365 345:943-949.
- 366 6. Wallerman O, Nord H, Bysani M, Borghini L, Wadelius C: lobChIP: from  
367 cells to sequencing ready ChIP libraries in a single day. *Epigenetics  
368 Chromatin* 2015, 8:25.
- 369 7. Adli M, Zhu J, Bernstein BE: Genome-wide chromatin maps derived from  
370 limited numbers of hematopoietic progenitors. *Nature Publishing Group*  
371 2010, 7:615-618.
- 372 8. Jakobsen JS, Bagger FO, Hasemann MS, Schuster MB, Frank A-K, Waage J,  
373 Vitting-Seerup K, Porse BT: Amplification of pico-scale DNA mediated by  
374 bacterial carrier DNA for small-cell-number transcription factor ChIP-seq.  
375 *BMC Genomics* 2015, 16:46.
- 376 9. Blecher-Gonen R, Barnett-Itzhaki Z, Jaitin D, Amann-Zalcenstein D, Lara-  
377 Astiaso D, Amit I: High-throughput chromatin immunoprecipitation for  
378 genome-wide mapping of in vivo protein-DNA interactions and  
379 epigenomic states. *Nature Protocols* 2013, 8:539-554.
- 380 10. Sachs M, Onodera C, Blaschke K, Ebata KT, Song JS, Ramalho-Santos M:  
381 Bivalent Chromatin Marks Developmental Regulatory Genes in the Mouse  
382 Embryonic Germline In Vivo. *Cell Reports* 2013, 3:1777-1784.
- 383 11. Shankaranarayanan P, Mendoza-Parra M-A, Walia M, Wang L, Li N,  
384 Trindade LM, Gronemeyer H: Single-tube linear DNA amplification  
385 (LinDA) for robust ChIP-seq. *Nature Methods* 2011, 8:565-567.
- 386 12. Zwart W, Koornstra R, Wesseling J, Rutgers E, Linn S, Carroll JS: A carrier-  
387 assisted ChIP-seq method for estrogen receptor-chromatin interactions  
388 from breast cancer core needle biopsy samples. *BMC Genomics* 2013,  
389 14:232.
- 390 13. Creighton MP, Cheng AW, Welstead GG, Kooistra T, Carey BW, Steine EJ,  
391 Hanna J, Lodato MA, Frampton GM, Sharp PA, et al: Histone H3K27ac

- 392 separates active from poised enhancers and predicts developmental state.  
393 *Proceedings of the National Academy of Sciences* 2010, 107:21931-21936.
- 394 14. Phillips JE, Corces VG: CTCF: master weaver of the genome. *Cell* 2009,  
395 137:1194-1211.
- 396 15. Muller-Tidow C, Klein HU, Hascher A, Isken F, Tickenbrock L, Thoennissen  
397 N, Agrawal-Singh S, Tschanter P, Disselhoff C, Wang Y, et al: Profiling of  
398 histone H3 lysine 9 trimethylation levels predicts transcription factor  
399 activity and survival in acute myeloid leukemia. *Blood* 2010, 116:3564-  
400 3571.
- 401 16. Lin CY, Erkek S, Tong Y, Yin L, Federation AJ, Zapatka M, Haldipur P,  
402 Kawauchi D, Risch T, Warnatz HJ, et al: Active medulloblastoma  
403 enhancers reveal subgroup-specific cellular origins. *Nature* 2016, 530:57-  
404 62.
- 405 17. Buenrostro JD, Giresi PG, Zaba LC, Chang HY, Greenleaf WJ: Transposition  
406 of native chromatin for fast and sensitive epigenomic profiling of open  
407 chromatin, DNA-binding proteins and nucleosome position. *Nat Methods*  
408 2013, 10:1213-1218.
- 409 18. FastQC, [www.bioinformatics.babraham.ac.uk/projects/fastqc/](http://www.bioinformatics.babraham.ac.uk/projects/fastqc/)
- 410 19. Langmead B, Salzberg SL: Fast gapped-read alignment with Bowtie 2.  
411 *Nature Publishing Group* 2012, 9:357-359.
- 412 20. Heinz S, Benner C, Spann N, Bertolino E, Lin YC, Laslo P, Cheng JX, Murre  
413 C, Singh H, Glass CK: Simple Combinations of Lineage-Determining  
414 Transcription Factors Prime cis-Regulatory Elements Required for  
415 Macrophage and B Cell Identities. *Molecular Cell* 2010, 38:576-589.
- 416 21. James Kent W, Sugnet CW, Furey TS, Roskin KM, Pringle TH, Zahler AM,  
417 Haussler D: The human genome browser at UCSC. *Journal of Genome*  
418 *Research* 2002, 12:996-1006.
- 419 22. The R Project for Statistical Computing, [www.r-project.org/](http://www.r-project.org/)
- 420 23. Quinlan AR, Hall IM: BEDTools: A flexible suite of utilities for comparing  
421 genomic features. *Bioinformatics* 2010, 26:841-842.
- 422 24. Lawrence M, Huber W, es HaeP, Aboyoun P, Carlson M, Gentleman R,  
423 Morgan M, Carey V: Software for Computing and Annotating Genomic  
424 Ranges. *PLoS Computational Biology* 2013, 9.

425 25. fastq-tools, <https://homes.cs.washington.edu/~dcjones/fastq-tools/>

426 26. European Nucleotide Archive (ENA), [www.ebi.ac.uk/ena](http://www.ebi.ac.uk/ena)

427

## 428 **LEGENDS**

429 Figure 1. High-throughput ChIPmentation (HT-CMI through direct amplification  
430 of tagmented chromatin, allows for rapid and technically simple analysis of  
431 histone modifications and transcription factor binding in low numbers of FACS  
432 sorted cells. a) Schematic overview of the HT-CM workflow (for a direct  
433 comparison between the HT-CM and original CM methods, see Fig. S1, Additional  
434 file 1). In brief, FACS sorted cells are sonicated, subjected to ChIP and tagmented.  
435 Library amplification is subsequently done without prior DNA purification. Input  
436 controls are prepared through direct tagmentation of sonicated chromatin. b)  
437 Genome-browser profiles from CM, HT-CM and input control samples generated  
438 using indicated cell-numbers and antibodies. c) Correlation between H3K27Ac  
439 signals (in a merged catalog containing all peaks identified in displayed samples)  
440 generated using indicated methods and cell numbers. d) Overlap (%) between  
441 top peaks (peaks with the 50% highest peak quality scores) identified in high  
442 cell-number (150k and 50k) H3K27Ac HT-CM and CM samples. e) RPKM of 1kb  
443 bins covering the whole genome in input control samples generated using  
444 indicated method and cell-equivalents of chromatin. f) Percentage of unique  
445 reads in H3K27Ac HT-CM and CM samples generated in parallel. g) Correlation  
446 between H3K27Ac/CTCF signals in samples generated using indicated methods  
447 and cell-numbers. h) Overlap (%) between top peaks identified in H3K27Ac and  
448 CTCF HT-CM samples generated using indicated cell-numbers. ND, not done. i)  
449 Time required to perform ChIP, library preparation and sequencing for the CM,  
450 HT-CM and 1-day HT-CM workflows. Hours (h) needed to perform each step are  
451 indicated.

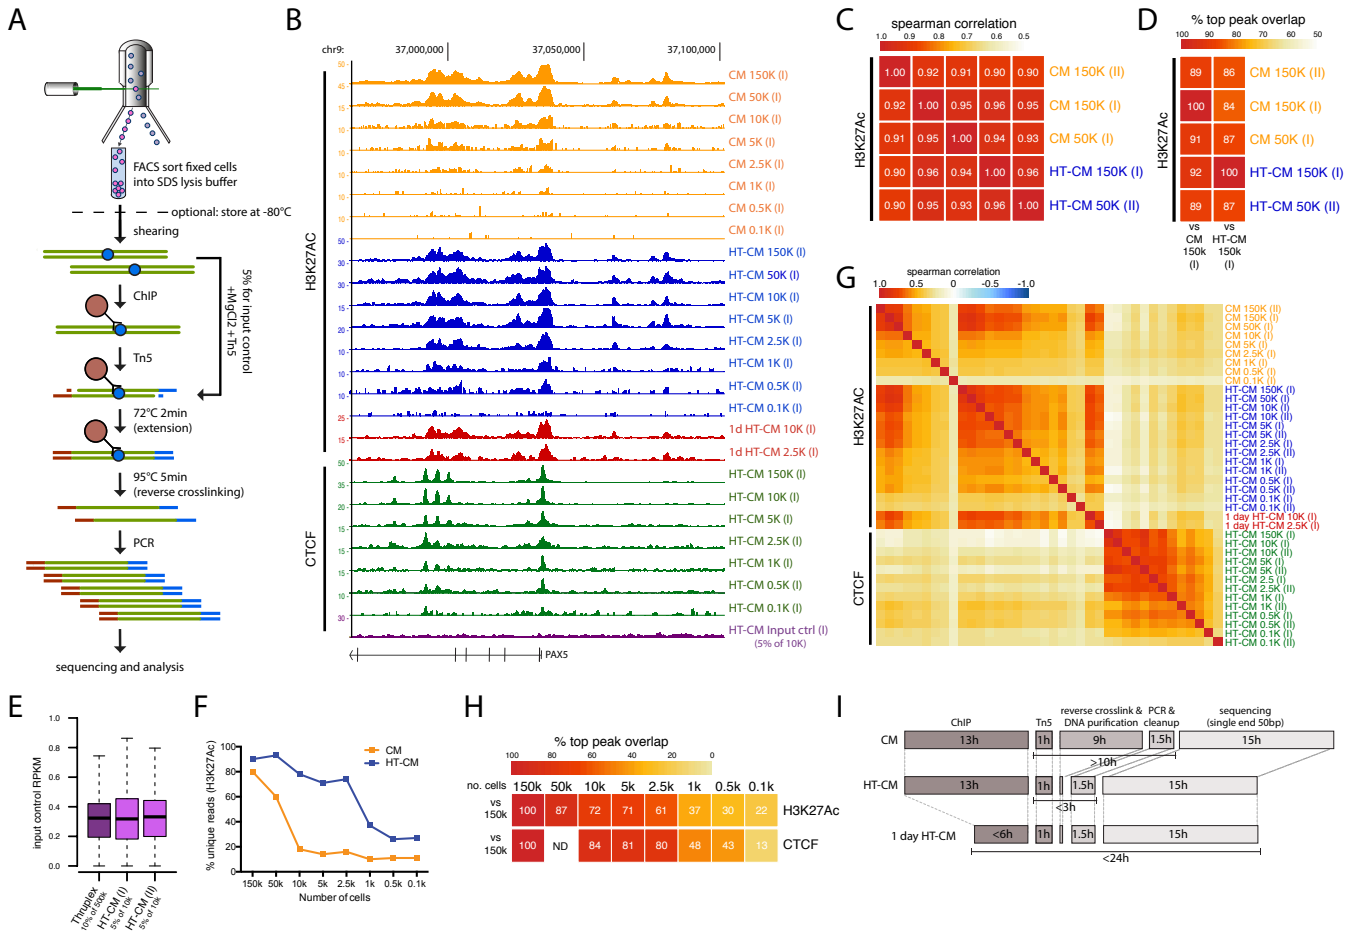

Source: https://www.biorxiv.org/content/10.1101/426957v1.full.pdf
